# Supplementary material
Source: PubMed Central journal article supplement (PMC8094034)

## Supplemental Online Content

Cusimano MC, Baxter NN, Sutradhar R, et al. Delay of pregnancy among physicians vs nonphysicians. *JAMA Intern Med*. Published online May 3, 2021.  
doi:10.1001/jamainternmed.2021.1635

**eTable 1.** Datasets from CPSO and ICES used in the present study.

**eTable 2.** List of Johns Hopkins Aggregated Diagnosis Groups (ADGs), with examples of common included diagnoses.

**eTable 3.** Baseline characteristics of physicians and non-physicians at the date of licensing.

**eTable 4.** Childbirth in nulliparous physicians and non-physicians after their actual or simulated licensing date respectively.

**eFigure 1.** Plot of  $\log[-\log(\text{survival})]$  versus  $\log(\text{time})$  for assessment of the proportional hazards assumption.

**eFigure 2.** Sensitivity analyses comparing the cumulative probability of childbirth between: (a) physicians to non-physicians in the highest income quintile; (b) physicians born 1976-1984 to physicians born 1985-1994; and (c) family physicians to surgical and non-surgical specialists.

This supplemental material has been provided by the authors to give readers additional information about their work.

**eTable 1.** Datasets from CPSO and ICES used in the present study.

| Database                                                                            | Description                                                                                                                                                                                                                                                      | Data Elements                                                                                                                                                                                                                           | Available Range                      |
|-------------------------------------------------------------------------------------|------------------------------------------------------------------------------------------------------------------------------------------------------------------------------------------------------------------------------------------------------------------|-----------------------------------------------------------------------------------------------------------------------------------------------------------------------------------------------------------------------------------------|--------------------------------------|
| College of Physicians and Surgeons of Ontario (CPSO)                                | Information about all physicians who initially registered for a license to practice medicine in Ontario.                                                                                                                                                         | Physician identifiers (encrypted), gender, date of initial registration, registration status, registration class, medical school, graduation year, practice information, specialty, language of practice                                | January 1, 1990 – November 26, 2018. |
| Registered Persons Database (RPDB)                                                  | A vital statistics registry; provides basic demographic information about anyone who has ever received an Ontario health card number. Data supplied by the Ontario Ministry and enriched with information from other ICES in-house datasets. April 1990 onwards. | Date of birth, sex, date of death, date of last contact, best known postal code, health care eligibility                                                                                                                                | April 1991 – January 2020            |
| Ontario Health Insurance Plan (OHIP) Claims Database                                | Includes most claims paid by OHIP to physicians, groups, and laboratories from July 1991.                                                                                                                                                                        | Physician and patient identifiers (encrypted), codes for services provided, date of service, associated diagnosis, fee paid                                                                                                             | July 1991 – February 2020            |
| Canadian Institute for Health Information (CIHI) Discharge Abstract Databases (DAD) | Contains patient-level data for acute, rehab, chronic and day surgery institutions in Ontario. Also contains information on patient co-morbidities at the time of admission. Includes ICD-10 codes.                                                              | Patient demographics (sex, date of birth, postal code, county/residence), clinical information (diagnoses, procedures, physicians), administrative data (institution number, admission category, length of stay, discharge disposition) | April 1988 – December 2019           |
| CIHI National Ambulatory Care Reporting System (NACRS)                              | Captures information of patient visits to hospital and community-based ambulatory care, including day surgery, outpatient clinics, and emergency department from July 2000 onwards.                                                                              | Emergency room visits                                                                                                                                                                                                                   | July 2000 – March 2019               |
| CIHI Same Day Surgery Database (SDS)                                                | Contains information on same-day surgical procedures.                                                                                                                                                                                                            | Institution, procedures                                                                                                                                                                                                                 | April 1991 – March 2019              |
| ICES Physicians Database (IPDB)                                                     | Includes information from the Ontario Health Insurance Plan (OHIP) Corporate Provider Database (CPDB), the Ontario Physician Human Resource Data Centre (OPHRDC) database and                                                                                    | Physician demographics (age, sex); specialty; location; measures of physician activity (billings, workload, types or services provided)                                                                                                 | January 1992 – December 2017         |

|                                                                                         |                                                                                                                                 |                                                                                                       |                         |
|-----------------------------------------------------------------------------------------|---------------------------------------------------------------------------------------------------------------------------------|-------------------------------------------------------------------------------------------------------|-------------------------|
|                                                                                         | the OHIP database of physician billings. It contains yearly information about all physicians in Ontario on a fiscal-year basis. |                                                                                                       |                         |
| Ontario Census Area Profiles (CENSUS)                                                   | Information on constituent income and other demographic information, collected by Statistics Canada.                            | Income quintile                                                                                       | Up to 2016              |
| Ontario Mother-Baby Linked Database (MOMBABY)                                           | Data on all inpatient admission records to mothers and their newborns delivered since 1988.                                     | Perinatal health information, pregnancy information (includes stillbirths, terminations, live births) | April 1988 – March 2019 |
| Immigration, Refugees and Citizenship Canada (IRCC)'s Permanent Resident Database (CIC) | Contains landing records for every permanent legal immigrant to Canada from 1985-2012.                                          | Date of landing, immigration class<br>Canadian language ability, level of education                   | January 1985-May 2017   |

**eTable 2.** List of Johns Hopkins Aggregated Diagnosis Groups (ADGs), with examples of common included diagnoses. Adapted from the Johns Hopkins ACG® System Technical Reference Guide, Version 10.

| Aggregated Diagnosis Group (ADG)                    | Examples                                                         |
|-----------------------------------------------------|------------------------------------------------------------------|
| 1. Time Limited: Minor                              | Non-infectious gastroenteritis, diaper rash                      |
| 2. Time Limited: Minor-Primary Infections           | Viral infection, croup                                           |
| 3. Time Limited: Major                              | Phlebitis of lower extremities, impaction of intestine           |
| 4. Time Limited: Major-Primary Infections           | Hepatitis, pyogenic arthritis                                    |
| 5. Allergies                                        | Allergic rhinitis, urticarial                                    |
| 6. Asthma                                           | Extrinsic asthma, intrinsic asthma                               |
| 7. Likely to Recur: Discrete                        | Gout, backache                                                   |
| 8. Likely to Recur: Discrete-Infections             | Chronic tonsillitis, urinary tract infection                     |
| 9. Likely to Recur: Progressive                     | Type II diabetes with ketoacidosis, central thrombosis           |
| 10. Chronic Medical: Stable                         | Type I diabetes, essential hypertension                          |
| 11. Chronic Medical: Unstable                       | Sickle cell anemia, cystic fibrosis                              |
| 12. Chronic Specialty: Stable-Orthopedic            | Cervical spondylosis without myelopathy, other joint derangement |
| 13. Chronic Specialty: Stable-Ear, Nose, Throat     | Central hearing loss, cholesteatoma                              |
| 14. Chronic Specialty: Stable-Eye                   | Myopia, disorder of conjunctiva                                  |
| 15. No Longer In Use*                               |                                                                  |
| 16. Chronic Specialty: Unstable-Orthopedic          | Spinal stenosis of lumbar region, osteochondritis dissecans      |
| 17. Chronic Specialty: Unstable-Ear, Nose, Throat   | Meniere's disease, chronic mastoiditis                           |
| 18. Chronic Specialty: Unstable-Eye                 | Unspecified glaucoma, scleritis/episcleritis                     |
| 19. No Longer In Use*                               |                                                                  |
| 20. Dermatologic                                    | Viral warts, non-neoplastic nevus                                |
| 21. Injuries/Adverse Effects: Minor                 | Neck sprain, injury to trunk                                     |
| 22. Injuries/Adverse Effects: Major                 | Intracranial injury, poisoning by cardiotoxic glycosides         |
| 23. Psychosocial: Time Limited, Minor               | Cannabis abuse, brief depressive reaction                        |
| 24. Psychosocial: Recurrent or Persistent, Stable   | Panic disorder, bulimia                                          |
| 25. Psychosocial: Recurrent or Persistent, Unstable | Catatonic schizophrenia, alcohol withdrawal delirium tremens     |
| 26. Signs/Symptoms: Minor                           | Headache, pain in limb                                           |
| 27. Signs/Symptoms: Uncertain                       | Effusion of lower leg joint, malaise and fatigue                 |
| 28. Signs/Symptoms: Major                           | Cardiomegaly, syncope and collapse                               |
| 29. Discretionary                                   | Inguinal hernia, sebaceous cyst                                  |
| 30. See and Reassure                                | Hypertrophy of breast, localized adiposity                       |
| 31. Malignancy                                      | Malignant neoplasm of breast, Hodgkin's disease                  |
| 32. Prevention/Administrative                       | Routine infant or child health check, gynecological examination  |
| 33. Pregnancy                                       | Pregnant state, delivery in a normal case                        |
| 34. Dental                                          | Dental caries, chronic gingivitis                                |

\* Only 32 of 34 markers are currently in use

**eTable 3.** Baseline characteristics of nulliparous physicians and non-physicians at the date of licensing.

| <b>Characteristic</b>                              | <b>Physicians<br/>(N=5,227)</b> | <b>Non-physicians<br/>(N=26,135)</b> | <b>Standardized<br/>difference</b> |
|----------------------------------------------------|---------------------------------|--------------------------------------|------------------------------------|
| <b>Age at index date (years)</b>                   |                                 |                                      |                                    |
| Median (IQR)                                       | 26 (25-28)                      | 26 (25-28)                           | 0.00                               |
| <b>Era of cohort entry, No. (%)</b>                |                                 |                                      |                                    |
| 1995-2006                                          | 783 (15.0%)                     | 3,947 (15.1%)                        | 0.01                               |
| 2007-2018                                          | 4,444 (85.0%)                   | 22,188 (84.9%)                       |                                    |
| <b>Residential income quintile, No. (%)</b>        |                                 |                                      |                                    |
| Urban quintile 1 (lowest)                          | 691 (13.2%)                     | 4,515 (17.3%)                        | 0.11                               |
| Urban quintile 2                                   | 826 (15.8%)                     | 4,832 (18.5%)                        | 0.07                               |
| Urban quintile 3                                   | 871 (16.7%)                     | 4,875 (18.7%)                        | 0.05                               |
| Urban quintile 4                                   | 961 (18.4%)                     | 4,888 (18.7%)                        | 0.01                               |
| Urban quintile 5 (highest)                         | 1,683 (32.2%)                   | 4,808 (18.4%)                        | 0.32                               |
| Rural residence                                    | 152 (2.9%)                      | 2,144 (8.2%)                         | 0.23                               |
| Missing                                            | 43 (0.8%)                       | 73 (0.3%)                            | 0.07                               |
| <b>Immigration status, No. (%)</b>                 |                                 |                                      |                                    |
| Canadian-born                                      | 4,425 (84.7%)                   | 23,040 (88.2%)                       | 0.10                               |
| Immigrant                                          | 802 (15.3%)                     | 3,095 (11.8%)                        |                                    |
| <b>Comorbidities (Johns Hopkins ADGs), No. (%)</b> |                                 |                                      |                                    |
| 0                                                  | 360 (6.9%)                      | 2,843 (10.9%)                        | 0.14                               |
| 1-5                                                | 3,304 (63.2%)                   | 14,057 (53.8%)                       | 0.19                               |
| 6-9                                                | 1,338 (25.6%)                   | 7,304 (27.9%)                        | 0.05                               |
| 10+                                                | 225 (4.3%)                      | 1,931 (7.4%)                         | 0.13                               |
| <b>Previous livebirths, No. (%)</b>                |                                 |                                      |                                    |
| 0                                                  | 5,227                           | 26,135                               | 0.00                               |

Abbreviations: ADGs (Aggregated Diagnosis Groups); No. (number), IQR (interquartile range)

**eTable 4.** Childbirth in nulliparous physicians and non-physicians after their actual or simulated licensing date respectively.

| Physician Status     | Physicians vs. Non-Physicians |         | Family Physicians vs. Non-Physicians |         | Other Specialists vs. Non-Physicians |         |
|----------------------|-------------------------------|---------|--------------------------------------|---------|--------------------------------------|---------|
|                      | HR (95% CI)                   | p-value | HR (95% CI)                          | p-value | HR (95% CI)                          | p-value |
| Non-physician        | Ref                           | –       | Ref                                  | –       | Ref                                  | –       |
| Postgraduate trainee | 0.79 (0.74, 0.85)             | <0.001  | 0.93 (0.83, 1.03)                    | 0.17    | 0.71 (0.64, 0.79)                    | <0.001  |
| Independent practice | 2.23 (2.10, 2.36)             | <0.001  | 2.18 (2.03, 2.35)                    | <0.0001 | 2.13 (1.92, 2.36)                    | <0.001  |

\* Excludes N=785 physicians with specialty not yet determined and N=100 physicians who could not be categorized due to missing specialty

**eFigure 1.** Plot of  $\log[-\log(\text{survival})]$  versus  $\log(\text{time})$  for assessment of the proportional hazards assumption.

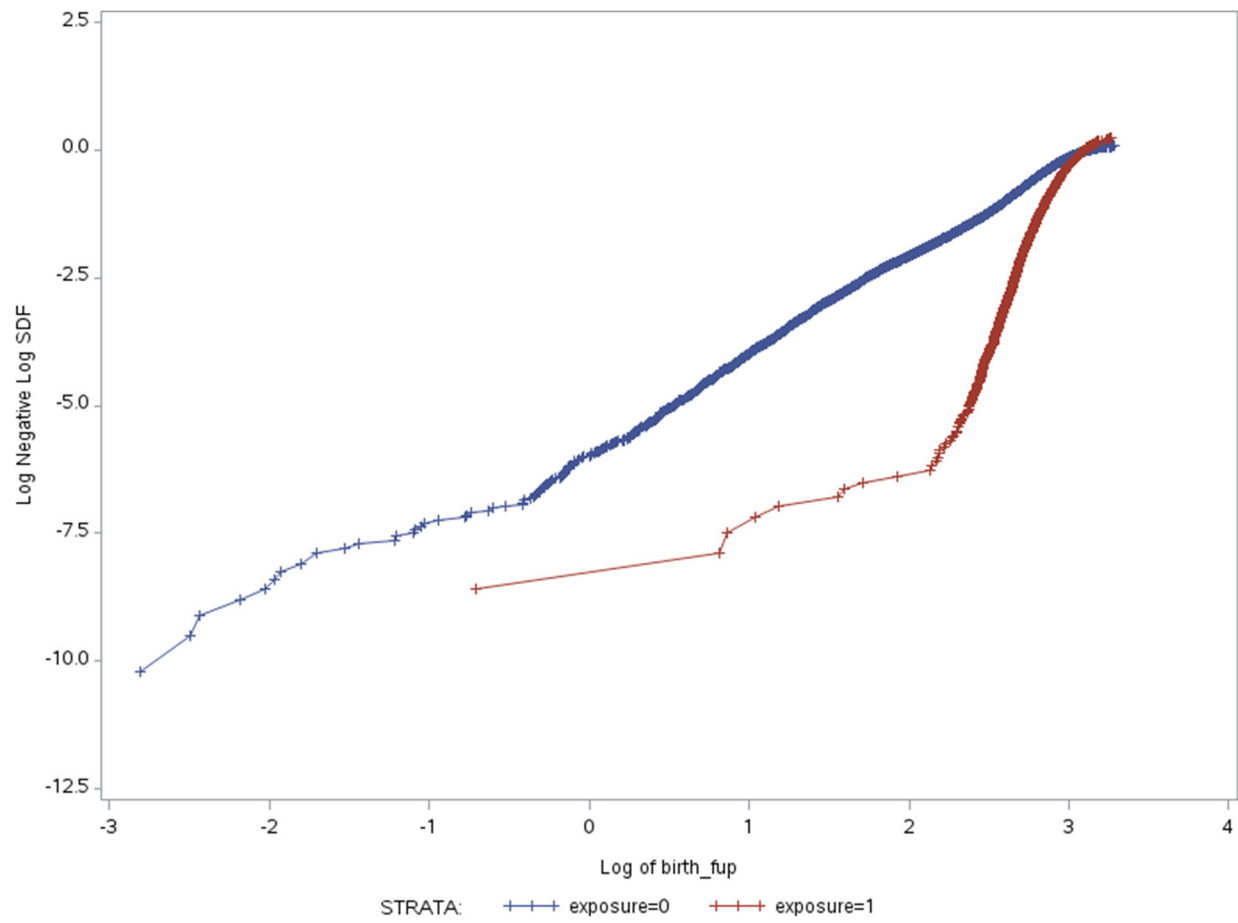

**eFigure 2.** Sensitivity analyses comparing the cumulative probability of childbirth between: (a) physicians to non-physicians in the highest income quintile; (b) physicians born 1976-1984 to physicians born 1985-1994; and (c) family physicians to surgical and non-surgical specialists.

a) Physicians versus non-physicians restricted to highest income quintile

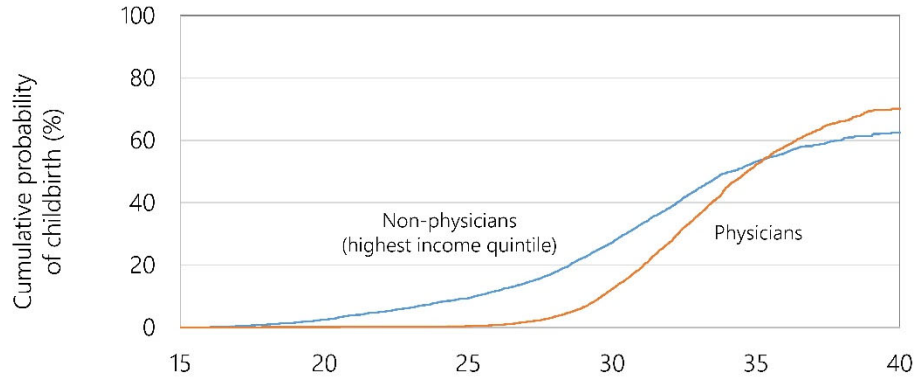

b) Physicians born 1976-1984 versus physicians born 1985-1994

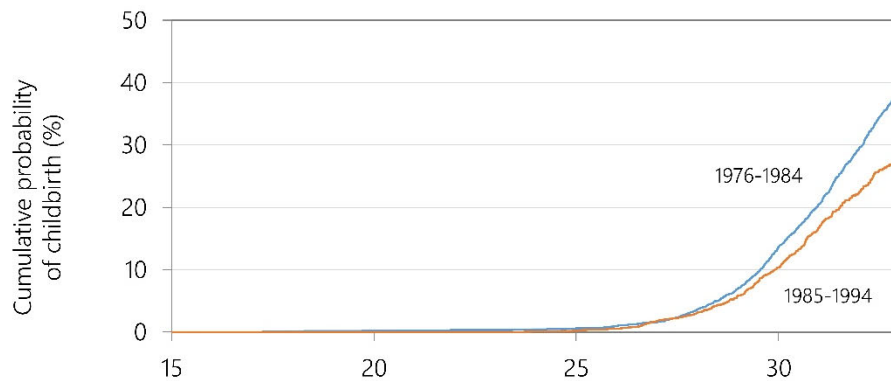

c) Family physicians versus surgical specialists versus non-surgical specialists

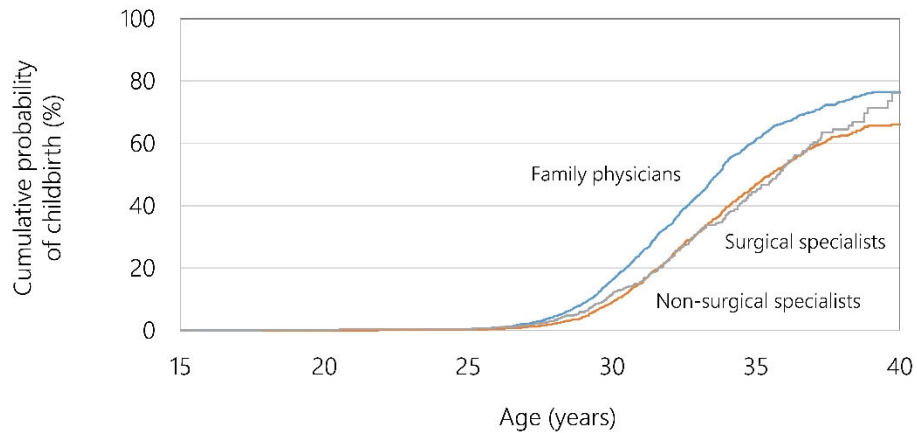

Supplement: jamainternmed-e211635-s002.pdf [file jamainternmed-e211635-s002.pdf]
