# Supplementary material
Source: PubMed Central journal article supplement (PMC8094034)
Supplement: jamainternmed-e211635-s001.pdf [file jamainternmed-e211635-s001.pdf]

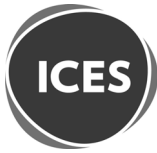

| <b>Project Initiation</b>                                                                                                      |                                                                                                                                                                                                                                                                                                                                                                                                                                                                                                                                                                                                                                                                                                                                                                                                                                                                                                                                                                                                                                                                                                                                                           |                               |                                     |                     |                                                                 |                          |             |                                                          |                          |                  |              |
|--------------------------------------------------------------------------------------------------------------------------------|-----------------------------------------------------------------------------------------------------------------------------------------------------------------------------------------------------------------------------------------------------------------------------------------------------------------------------------------------------------------------------------------------------------------------------------------------------------------------------------------------------------------------------------------------------------------------------------------------------------------------------------------------------------------------------------------------------------------------------------------------------------------------------------------------------------------------------------------------------------------------------------------------------------------------------------------------------------------------------------------------------------------------------------------------------------------------------------------------------------------------------------------------------------|-------------------------------|-------------------------------------|---------------------|-----------------------------------------------------------------|--------------------------|-------------|----------------------------------------------------------|--------------------------|------------------|--------------|
| <b>This Section must be Completed Prior to Project Dataset(s) Creation</b>                                                     |                                                                                                                                                                                                                                                                                                                                                                                                                                                                                                                                                                                                                                                                                                                                                                                                                                                                                                                                                                                                                                                                                                                                                           |                               |                                     |                     |                                                                 |                          |             |                                                          |                          |                  |              |
| <b>Project Title:</b>                                                                                                          | The Dr. Mom Cohort: A Population-Based Study of the Pregnancy Outcomes and Parental Leave Practices of Ontario's Women Physicians                                                                                                                                                                                                                                                                                                                                                                                                                                                                                                                                                                                                                                                                                                                                                                                                                                                                                                                                                                                                                         |                               |                                     |                     |                                                                 |                          |             |                                                          |                          |                  |              |
| <b>Project TRIM number:</b>                                                                                                    | 2019 0906 355 000                                                                                                                                                                                                                                                                                                                                                                                                                                                                                                                                                                                                                                                                                                                                                                                                                                                                                                                                                                                                                                                                                                                                         |                               |                                     |                     |                                                                 |                          |             |                                                          |                          |                  |              |
| <b>Research Program:</b>                                                                                                       | Cancer                                                                                                                                                                                                                                                                                                                                                                                                                                                                                                                                                                                                                                                                                                                                                                                                                                                                                                                                                                                                                                                                                                                                                    |                               |                                     |                     |                                                                 |                          |             |                                                          |                          |                  |              |
| <b>Site:</b>                                                                                                                   | ICES Central                                                                                                                                                                                                                                                                                                                                                                                                                                                                                                                                                                                                                                                                                                                                                                                                                                                                                                                                                                                                                                                                                                                                              |                               |                                     |                     |                                                                 |                          |             |                                                          |                          |                  |              |
| <b>Project Objectives:</b>                                                                                                     | <p><i>Insert Project Objectives as listed in the approved ICES Project PIA</i></p> <p>1. To determine if women physicians have different reproductive characteristics (e.g. age at first childbirth, number of childbirths, number of recognized pregnancies, utilization of assisted reproductive technologies) compared to their non-physician counterparts</p> <p>2. To determine if time to first childbirth is different for women physicians compared to their non-physician counterparts</p>                                                                                                                                                                                                                                                                                                                                                                                                                                                                                                                                                                                                                                                       |                               |                                     |                     |                                                                 |                          |             |                                                          |                          |                  |              |
| <b>ICES Project PIA Initial Approval Date:</b>                                                                                 | <p><i>The ICES Employee or agent who is responsible for creating the Project Dataset(s) is responsible for ensuring there is an approved ICES Project PIA and verifying the date of approval prior to creating the Project Dataset(s)</i></p> <p>yyyy-mon-dd</p>                                                                                                                                                                                                                                                                                                                                                                                                                                                                                                                                                                                                                                                                                                                                                                                                                                                                                          |                               |                                     |                     |                                                                 |                          |             |                                                          |                          |                  |              |
| <b>Principal Investigator (PI):</b>                                                                                            | Dr. Andrea Simpson                                                                                                                                                                                                                                                                                                                                                                                                                                                                                                                                                                                                                                                                                                                                                                                                                                                                                                                                                                                                                                                                                                                                        |                               |                                     |                     |                                                                 |                          |             |                                                          |                          |                  |              |
| <b>Check the applicable box if the PI is an ICES Student/Trainee</b>                                                           | <input checked="" type="checkbox"/> ICES Student <input type="checkbox"/> ICES Fellow <input type="checkbox"/> ICES Post-Doctoral Trainee <input type="checkbox"/> Visiting Scholar                                                                                                                                                                                                                                                                                                                                                                                                                                                                                                                                                                                                                                                                                                                                                                                                                                                                                                                                                                       |                               |                                     |                     |                                                                 |                          |             |                                                          |                          |                  |              |
| <b>Responsible ICES Scientist:</b>                                                                                             | <p><i>Name the Responsible ICES Scientist if the PI is not a Full Status ICES Scientist</i></p> <p>Dr. Nancy Baxter</p>                                                                                                                                                                                                                                                                                                                                                                                                                                                                                                                                                                                                                                                                                                                                                                                                                                                                                                                                                                                                                                   |                               |                                     |                     |                                                                 |                          |             |                                                          |                          |                  |              |
| <b>Project Team Member(s) Responsible for Project Dataset Creation and/or Statistical Analysis and date joined (list all):</b> | <p><i>All person(s) (ICES Analyst, Appointed Analyst, Analytic Epidemiologist, PI, and/or Student) responsible for creating the Project Dataset(s) and/or statistical analysis on the Research Analytics Environment (RAE) and the date they joined the project must be recorded</i></p> <table border="1"> <tr> <td>Mr. Eric McArthur</td> <td>2018-Jul-25</td> </tr> </table>                                                                                                                                                                                                                                                                                                                                                                                                                                                                                                                                                                                                                                                                                                                                                                           | Mr. Eric McArthur             | 2018-Jul-25                         |                     |                                                                 |                          |             |                                                          |                          |                  |              |
| Mr. Eric McArthur                                                                                                              | 2018-Jul-25                                                                                                                                                                                                                                                                                                                                                                                                                                                                                                                                                                                                                                                                                                                                                                                                                                                                                                                                                                                                                                                                                                                                               |                               |                                     |                     |                                                                 |                          |             |                                                          |                          |                  |              |
| <b>Other ICES Project Team Members and date joined (list all):</b>                                                             | <p><i>All other Research Project Team Members (e.g., Research Administrative Assistants, Research Assistants, Project Managers, Epidemiologists) and the date they joined the project must be recorded</i></p> <table border="1"> <tr> <td>Dr. Maria Cusimano</td> <td>2018-Feb-28</td> </tr> <tr> <td>Dr. Rinku Sutradhar</td> <td>2018-Jul-25</td> </tr> <tr> <td>Dr. Amit Garg</td> <td>2018-Jul-25</td> </tr> <tr> <td>Dr. Joel Ray</td> <td>2018-Sept-06</td> </tr> <tr> <td>Dr. Simone Vigod</td> <td>2018-Sept-06</td> </tr> </table>                                                                                                                                                                                                                                                                                                                                                                                                                                                                                                                                                                                                              | Dr. Maria Cusimano            | 2018-Feb-28                         | Dr. Rinku Sutradhar | 2018-Jul-25                                                     | Dr. Amit Garg            | 2018-Jul-25 | Dr. Joel Ray                                             | 2018-Sept-06             | Dr. Simone Vigod | 2018-Sept-06 |
| Dr. Maria Cusimano                                                                                                             | 2018-Feb-28                                                                                                                                                                                                                                                                                                                                                                                                                                                                                                                                                                                                                                                                                                                                                                                                                                                                                                                                                                                                                                                                                                                                               |                               |                                     |                     |                                                                 |                          |             |                                                          |                          |                  |              |
| Dr. Rinku Sutradhar                                                                                                            | 2018-Jul-25                                                                                                                                                                                                                                                                                                                                                                                                                                                                                                                                                                                                                                                                                                                                                                                                                                                                                                                                                                                                                                                                                                                                               |                               |                                     |                     |                                                                 |                          |             |                                                          |                          |                  |              |
| Dr. Amit Garg                                                                                                                  | 2018-Jul-25                                                                                                                                                                                                                                                                                                                                                                                                                                                                                                                                                                                                                                                                                                                                                                                                                                                                                                                                                                                                                                                                                                                                               |                               |                                     |                     |                                                                 |                          |             |                                                          |                          |                  |              |
| Dr. Joel Ray                                                                                                                   | 2018-Sept-06                                                                                                                                                                                                                                                                                                                                                                                                                                                                                                                                                                                                                                                                                                                                                                                                                                                                                                                                                                                                                                                                                                                                              |                               |                                     |                     |                                                                 |                          |             |                                                          |                          |                  |              |
| Dr. Simone Vigod                                                                                                               | 2018-Sept-06                                                                                                                                                                                                                                                                                                                                                                                                                                                                                                                                                                                                                                                                                                                                                                                                                                                                                                                                                                                                                                                                                                                                              |                               |                                     |                     |                                                                 |                          |             |                                                          |                          |                  |              |
| <b>Confirmation that DCP is consistent with Project Objectives:</b>                                                            | <p><i>The following individuals must confirm that the ICES Data provided for in this DCP is relevant (e.g., with respect to cohort, timeframe, and variables) and required to achieve the Project Objectives stated in the ICES Project PIA prior to initial Project Dataset creation: 1) PI; 2) Responsible ICES Scientist if the PI is not a Full Status ICES Scientist, or a second ICES Scientist or the Scientific Program Lead if the PI is creating both the DCP and the Project Dataset[s]; 3) ICES Research and Analysis Staff creating the DCP; and 4) ICES Analytic Staff (ICES Employee or agent responsible for creating the Project Dataset[s]). This may be delegated either verbally or via e-mail.</i></p> <table border="1"> <tr> <td><b>Principal Investigator</b></td> <td><input checked="" type="checkbox"/></td> <td>2019-04-04</td> </tr> <tr> <td><b>Responsible ICES Scientist or Second ICES Scientist/Lead</b></td> <td><input type="checkbox"/></td> <td>yyyy-mon-dd</td> </tr> <tr> <td><b>ICES Research and Analysis Staff Creating the DCP</b></td> <td><input type="checkbox"/></td> <td>yyyy-mon-dd</td> </tr> </table> | <b>Principal Investigator</b> | <input checked="" type="checkbox"/> | 2019-04-04          | <b>Responsible ICES Scientist or Second ICES Scientist/Lead</b> | <input type="checkbox"/> | yyyy-mon-dd | <b>ICES Research and Analysis Staff Creating the DCP</b> | <input type="checkbox"/> | yyyy-mon-dd      |              |
| <b>Principal Investigator</b>                                                                                                  | <input checked="" type="checkbox"/>                                                                                                                                                                                                                                                                                                                                                                                                                                                                                                                                                                                                                                                                                                                                                                                                                                                                                                                                                                                                                                                                                                                       | 2019-04-04                    |                                     |                     |                                                                 |                          |             |                                                          |                          |                  |              |
| <b>Responsible ICES Scientist or Second ICES Scientist/Lead</b>                                                                | <input type="checkbox"/>                                                                                                                                                                                                                                                                                                                                                                                                                                                                                                                                                                                                                                                                                                                                                                                                                                                                                                                                                                                                                                                                                                                                  | yyyy-mon-dd                   |                                     |                     |                                                                 |                          |             |                                                          |                          |                  |              |
| <b>ICES Research and Analysis Staff Creating the DCP</b>                                                                       | <input type="checkbox"/>                                                                                                                                                                                                                                                                                                                                                                                                                                                                                                                                                                                                                                                                                                                                                                                                                                                                                                                                                                                                                                                                                                                                  | yyyy-mon-dd                   |                                     |                     |                                                                 |                          |             |                                                          |                          |                  |              |





| <b>ICES Data</b>                                                                                                                                                                                                                                                                              |                                                                                |
|-----------------------------------------------------------------------------------------------------------------------------------------------------------------------------------------------------------------------------------------------------------------------------------------------|--------------------------------------------------------------------------------|
| <b>This Section must be Completed Prior to Project Dataset(s) Creation</b>                                                                                                                                                                                                                    |                                                                                |
| <p><i>The ICES Employee or agent who is responsible for creating the Project Dataset(s) must ensure that this list includes only data listed in the ICES Project PIA</i></p> <p><i>Changes to this list after initial ICES Project PIA approval require an ICES Project PIA Amendment</i></p> | <p><i>Mandatory for all datasets that are available by individual year</i></p> |
| <b>General Use Datasets – Health Services</b>                                                                                                                                                                                                                                                 | <b>Years (where applicable)</b>                                                |
| CIHI DAD                                                                                                                                                                                                                                                                                      | April 1, 1988 – Most recent                                                    |
| CIHI SDS                                                                                                                                                                                                                                                                                      | April 1, 1991 – Most recent                                                    |
| NACRS                                                                                                                                                                                                                                                                                         | July 1, 2000 – Most recent                                                     |
| OMHRS                                                                                                                                                                                                                                                                                         | October 1, 2005 – Most recent                                                  |
| CAPE                                                                                                                                                                                                                                                                                          | March 1, 1999 – Most recent                                                    |
| OLIS                                                                                                                                                                                                                                                                                          | January 1, 2007 – Most recent                                                  |
| <b>General Use Datasets – Care Providers</b>                                                                                                                                                                                                                                                  |                                                                                |
| IPDB                                                                                                                                                                                                                                                                                          | January 1, 1992 – Most recent                                                  |
| <b>General Use Datasets – Population</b>                                                                                                                                                                                                                                                      |                                                                                |
| RPDB                                                                                                                                                                                                                                                                                          | April 1, 1991 – Most recent                                                    |
| CENSUS                                                                                                                                                                                                                                                                                        | Most recent                                                                    |
| <b>General Use Datasets – Coding/Geography/Facilities</b>                                                                                                                                                                                                                                     |                                                                                |
| LHIN                                                                                                                                                                                                                                                                                          | Most recent                                                                    |
| INST                                                                                                                                                                                                                                                                                          | April 1, 1988 – Most recent                                                    |
| <b>General Use Datasets – Other</b>                                                                                                                                                                                                                                                           |                                                                                |
| MOMBABY                                                                                                                                                                                                                                                                                       | April 1, 1988 – Most recent                                                    |
| ONMARG                                                                                                                                                                                                                                                                                        | Most recent                                                                    |
| HYPER                                                                                                                                                                                                                                                                                         | April 1, 1991 – Most recent                                                    |
| ODD                                                                                                                                                                                                                                                                                           | April 1, 1991 – Most recent                                                    |
| <b>Controlled Use Datasets</b>                                                                                                                                                                                                                                                                |                                                                                |
| ORGD                                                                                                                                                                                                                                                                                          | January 1, 2007 – Most recent                                                  |
| CIC                                                                                                                                                                                                                                                                                           | January 1985 - April 21, 2016                                                  |
| <b>Other Datasets</b>                                                                                                                                                                                                                                                                         |                                                                                |
| BORN                                                                                                                                                                                                                                                                                          | April 1, 2006 – Most recent                                                    |
| CPSO (imported to ICES)                                                                                                                                                                                                                                                                       | January 1, 1990 – April 21, 2016                                               |



| Project Amendments and Reconciliation                               |                                                                                                                                                                                 |                                          |                                                                                                                                            |
|---------------------------------------------------------------------|---------------------------------------------------------------------------------------------------------------------------------------------------------------------------------|------------------------------------------|--------------------------------------------------------------------------------------------------------------------------------------------|
| ICES Project PIA Amendment History (add additional rows as needed): | <i>Privacy approval date</i>                                                                                                                                                    | <i>Person who submitted amendment</i>    | <i>Note that any changes to the list of ICES Data or Project Objectives require an ICES Project PIA Amendment</i>                          |
|                                                                     | <b>Date</b>                                                                                                                                                                     | <b>Name</b>                              | <b>Amendment</b>                                                                                                                           |
|                                                                     | 2019-07-22                                                                                                                                                                      | Andrea Simpson                           | Add CIC (permission obtained)                                                                                                              |
| DCP Amendment History (add additional rows as needed):              | <i>Date DCP amended</i>                                                                                                                                                         | <i>Person who made the DCP amendment</i> | <i>Note that any DCP amendments involving changes to the list of ICES Data or Project Objectives require an ICES Project PIA Amendment</i> |
|                                                                     | <b>Date</b>                                                                                                                                                                     | <b>Name</b>                              | <b>Amendment</b>                                                                                                                           |
|                                                                     | yyyy-mon-dd                                                                                                                                                                     |                                          |                                                                                                                                            |
| Date Programs/DCP reconciled                                        | <i>The person(s) creating the dataset and/or analyzing the data are responsible for ensuring that the final DCP reflects the final program(s) when the project is completed</i> |                                          |                                                                                                                                            |
|                                                                     | yyyy-mon-dd                                                                                                                                                                     |                                          |                                                                                                                                            |

| Project Cohort                 |                                                                                                                                                                                                                                                                                                                                                                                                                                                                                                                                                                                                                      |                                                                       |             |   |                                                                       |   |                                                   |
|--------------------------------|----------------------------------------------------------------------------------------------------------------------------------------------------------------------------------------------------------------------------------------------------------------------------------------------------------------------------------------------------------------------------------------------------------------------------------------------------------------------------------------------------------------------------------------------------------------------------------------------------------------------|-----------------------------------------------------------------------|-------------|---|-----------------------------------------------------------------------|---|---------------------------------------------------|
| Study Design                   | <input checked="" type="checkbox"/> Cohort study <input checked="" type="checkbox"/> Matched cohort study <input type="checkbox"/> Case-control study<br><input type="checkbox"/> Cross-sectional study <input type="checkbox"/> Other (specify):                                                                                                                                                                                                                                                                                                                                                                    |                                                                       |             |   |                                                                       |   |                                                   |
| Index Event/Inclusion Criteria | <p><b>Population:</b> All Ontario women of reproductive age (15-50 years) between January 1, 1995 and November 26, 2018 with valid IKNs</p> <p><b>Inclusion Criteria:</b></p> <ol style="list-style-type: none"> <li>Female</li> <li>Age 15-50 years at index date</li> <li>Index date between January 1, 1995 to November 26, 2018</li> </ol> <p><b>Index Date:</b><br/>           Frequency matched analysis: Age 15 for both physicians and non-physicians<br/>           Individual matched analysis: Date of first registration with CPSO for physicians, or corresponding simulated date in non-physicians</p> |                                                                       |             |   |                                                                       |   |                                                   |
| Estimated Size of Cohort       | N/A                                                                                                                                                                                                                                                                                                                                                                                                                                                                                                                                                                                                                  |                                                                       |             |   |                                                                       |   |                                                   |
| Exclusions (in order)          | <table border="1"> <thead> <tr> <th>Step</th> <th>Description</th> </tr> </thead> <tbody> <tr> <td>1</td> <td>Non-Ontario resident (first two digits of 'PRCDDABLK' not 35 in RPDB)</td> </tr> <tr> <td>2</td> <td>Non-continuous OHIP eligibility from age 15 years</td> </tr> </tbody> </table>                                                                                                                                                                                                                                                                                                                    | Step                                                                  | Description | 1 | Non-Ontario resident (first two digits of 'PRCDDABLK' not 35 in RPDB) | 2 | Non-continuous OHIP eligibility from age 15 years |
|                                | Step                                                                                                                                                                                                                                                                                                                                                                                                                                                                                                                                                                                                                 | Description                                                           |             |   |                                                                       |   |                                                   |
|                                | 1                                                                                                                                                                                                                                                                                                                                                                                                                                                                                                                                                                                                                    | Non-Ontario resident (first two digits of 'PRCDDABLK' not 35 in RPDB) |             |   |                                                                       |   |                                                   |
| 2                              | Non-continuous OHIP eligibility from age 15 years                                                                                                                                                                                                                                                                                                                                                                                                                                                                                                                                                                    |                                                                       |             |   |                                                                       |   |                                                   |
|                                |                                                                                                                                                                                                                                                                                                                                                                                                                                                                                                                                                                                                                      |                                                                       |             |   |                                                                       |   |                                                   |
|                                |                                                                                                                                                                                                                                                                                                                                                                                                                                                                                                                                                                                                                      |                                                                       |             |   |                                                                       |   |                                                   |



| <b>Project Time Frame Definitions</b>                                                                                                                                                                                                                                                                                                                                                                                                                                                                                                        |                                                                                                                                                                                                                                            |
|----------------------------------------------------------------------------------------------------------------------------------------------------------------------------------------------------------------------------------------------------------------------------------------------------------------------------------------------------------------------------------------------------------------------------------------------------------------------------------------------------------------------------------------------|--------------------------------------------------------------------------------------------------------------------------------------------------------------------------------------------------------------------------------------------|
| <p style="text-align: center;"><b>Accrual Window:</b><br/>January 1, 1995 – November 26, 2018</p> <p style="text-align: center;"><b>Maximum Follow-up Date:</b><br/>Latest Update of MOMBABY</p> <p style="text-align: center;"><b>Look-Back Window:</b><br/>Details below</p> <p style="text-align: center;"><b>Observation Window:</b><br/>To date of first livebirth/stillbirth<br/>&gt;20 weeks or censoring</p> <p style="text-align: center;"><b>Index Date:</b> Date of first CPSO registration<br/>or simulated date in controls</p> |                                                                                                                                                                                                                                            |
| <b>Accrual Start/End Dates</b>                                                                                                                                                                                                                                                                                                                                                                                                                                                                                                               | January 1, 1995 to April 21, 2016                                                                                                                                                                                                          |
| <b>Max Follow-up Date</b>                                                                                                                                                                                                                                                                                                                                                                                                                                                                                                                    | Latest update of MOMBABY (March 31, 2019)                                                                                                                                                                                                  |
| <b>When does observation window terminate?</b>                                                                                                                                                                                                                                                                                                                                                                                                                                                                                               | Latest update of MOMBABY                                                                                                                                                                                                                   |
| <b>Lookback Window(s)</b>                                                                                                                                                                                                                                                                                                                                                                                                                                                                                                                    | To maximum 2 years:<br><ul style="list-style-type: none"> <li>- Covariates: Comorbidities (ADGs)</li> </ul> Earliest available:<br><ul style="list-style-type: none"> <li>- Covariates: Immigration status, previous livebirths</li> </ul> |

| <b>Variable Definitions (add additional rows as needed)</b> |                                                                                                                                                                                                                                                                                                                                                                                                                                                                                                                                                                                                                                                                    |
|-------------------------------------------------------------|--------------------------------------------------------------------------------------------------------------------------------------------------------------------------------------------------------------------------------------------------------------------------------------------------------------------------------------------------------------------------------------------------------------------------------------------------------------------------------------------------------------------------------------------------------------------------------------------------------------------------------------------------------------------|
| <b>Main Exposure or Risk Factor</b>                         | <b>Physician occupation</b> <ul style="list-style-type: none"> <li>• Two-level covariate:               <ul style="list-style-type: none"> <li>○ Exposure: Registration as a physician (i.e. record in CPSO dataset)</li> <li>○ Comparator: Non-physician (i.e. no record in CPSO dataset)</li> </ul> </li> <li>• Three-level time-varying covariate               <ul style="list-style-type: none"> <li>○ Non-physician (i.e. no record in CPSO dataset)</li> <li>○ Postgraduate trainee (i.e. record in CPSO dataset but not in OHIP)</li> <li>○ Independent physician (i.e. records in CPSO dataset and OHIP for billings)</li> </ul> </li> </ul>              |
| <b>Primary Outcome Definition</b>                           | <b>First/next childbirth</b> (time-to-event) = Defined as the first livebirth/stillbirth $\geq 20$ weeks GA experienced after the index date (presence of a record in MOMBABY)                                                                                                                                                                                                                                                                                                                                                                                                                                                                                     |
| <b>Secondary Outcome Definition(s)</b>                      | <b>Age at first/next childbirth</b> (continuous) = Defined as maternal age at first childbirth (derived from RPDB, MOMBABY)                                                                                                                                                                                                                                                                                                                                                                                                                                                                                                                                        |
| <b>Baseline Characteristics</b>                             | <b>1) Age at index date</b> (from RPDB): <ul style="list-style-type: none"> <li>• Report as continuous variable (with mean/SD and median/IQR)</li> </ul> <b>2) Year at study entry</b> (from RPDB): <ul style="list-style-type: none"> <li>• Defined as calendar year of index date</li> <li>• Also report as categorical variable (1995-2006, 2007-2018)</li> </ul> <b>3) Residential income quintile</b> (from RPDB): <ul style="list-style-type: none"> <li>• Report combined 6-level rural/income variable, with category for missing               <ul style="list-style-type: none"> <li>○ Rural</li> <li>○ Urban + Income Quintile 1</li> </ul> </li> </ul> |



| Variable Definitions (add additional rows as needed)                                        |                                                                                                                                                                                                                                                                                                                                                                                                                                                                                                                                                                                                                                                                                                                                                                                                                                                                                                                                                                                                                                                                                                                                                                                                                                                                                                                                       |
|---------------------------------------------------------------------------------------------|---------------------------------------------------------------------------------------------------------------------------------------------------------------------------------------------------------------------------------------------------------------------------------------------------------------------------------------------------------------------------------------------------------------------------------------------------------------------------------------------------------------------------------------------------------------------------------------------------------------------------------------------------------------------------------------------------------------------------------------------------------------------------------------------------------------------------------------------------------------------------------------------------------------------------------------------------------------------------------------------------------------------------------------------------------------------------------------------------------------------------------------------------------------------------------------------------------------------------------------------------------------------------------------------------------------------------------------|
|                                                                                             | <ul style="list-style-type: none"> <li>○ Urban + Income Quintile 2</li> <li>○ Urban + Income Quintile 3</li> <li>○ Urban + Income Quintile 4</li> <li>○ Urban + Income Quintile 5</li> <li>○ Missing</li> </ul> <p><b>4) Immigration status</b> (from CIC):</p> <ul style="list-style-type: none"> <li>• Report as categorical variable: Canadian born (no landing date or landing date prior to 1985); immigrant (landing date present)</li> </ul> <p><b>5) Comorbidities</b> (from NACRS, DAD, SDS, OHIP):</p> <ul style="list-style-type: none"> <li>• Use ACG System software to collapse patient diagnoses from the preceding 2 years of health service utilization into appropriate Johns Hopkins Aggregated Diagnosis Groups (ADGs) as a measure of comorbidity</li> <li>• Report as categorical variable: no comorbidity (0), low comorbidity (1-5 ADGs), moderate comorbidity (6-9 ADGs), and high comorbidity (<math>\geq 10</math> ADGs)</li> </ul> <p><b>6) Childbirths before index date</b> (from MOMBABY)</p> <ul style="list-style-type: none"> <li>• Defined as the total number of livebirth <math>\geq 20</math> weeks GA before the index date (number of records in MOMBABY; full details in Appendix 1)</li> <li>• Report as categorical variable: 0, 1, 2+</li> <li>• Report as count variable also</li> </ul> |
| <p><b>Work-Related Characteristics</b><br/>(relevant to Objective 3 on physicians only)</p> | <p><b>1) Specialty at index date</b> (from IPDB, CPSO dataset):</p> <ul style="list-style-type: none"> <li>• Available for physicians with independent license</li> <li>• Report as binary variable: Family physician vs. other specialists</li> <li>• Algorithm to identify specialty:               <ul style="list-style-type: none"> <li>○ Use 'Current Specialty' variable in CPSO dataset</li> <li>○ If 'Current Specialty' variable is missing in CPSO dataset, attempt linkage of physician to either IPDB or OHIP</li> <li>○ If specialty available in IPDB, then assign appropriately</li> <li>○ If physnum/spec available in OHIP, then assign appropriately</li> <li>○ If not linkable to IPDB or OHIP and graduation year <math>\geq 2013</math>, then classify as "specialty not yet determined" due to ongoing training</li> </ul> </li> </ul>                                                                                                                                                                                                                                                                                                                                                                                                                                                                         |

**Analysis Plan (expand/modify as needed)**

**DESCRIPTIVE TABLES**

*Table 1.* Baseline characteristics of frequency-matched & individual-matched cohorts

*Table 2.* Reproductive outcomes of frequency-matched & individual-matched cohorts

**FREQUENCY-MATCHED COHORT**

- 1) Randomly select a subset of non-physicians from RPDB
- 2) Frequency sampling so ratio of non-physicians to physicians is 5:1 based on the distribution of their birth years

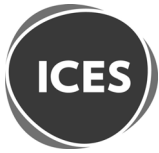

- 3) Randomly assign a dummy date in non-physicians corresponding to the distribution of CPSO registration dates among physicians; if the non-physician is not eligible on that date, then they should be replaced with a different non-physician
- 4) Individuals will be followed from their 15<sup>th</sup> birthday (time 0)
- 5) Compare baseline characteristics between physicians and non-physicians (standardized differences)
- 6) Run Cox proportional hazards model for time-to-childbirth & generate cumulative probability curves for childbirth (maternal age as the time scale) for physicians vs. non-physicians
  - a. Overall and stratified by specialty
  - b. Reproductive lifespan, and <37 years and  $\geq$ 37 years
  - c. With and without adjustment for area-level income quintile

### INDIVIDUAL-MATCHED COHORT

- 1) Hard match each physician with 5 non-physicians (i.e., 1:5 ratio) on:
  - Exact age (years)
  - Year of licensing (actual or simulated date of CPSO registration)
  - Number of livebirths  $\geq$ 20 weeks' GA before index date (0, 1, >2)
- 2) Individuals will be followed from the actual or simulated date of CPSO registration (time 0)
- 3) Compare baseline characteristics between physicians and non-physicians (standardized differences)
- 4) Run Cox proportional hazards model for time-to-childbirth & generate cumulative probability curves (years of follow-up as the time scale) for physicians vs. non-physicians
  - a. Overall and stratified by specialty
  - b. Binary variable and three-level time-varying covariate
  - c. With and without adjustment for area-level income quintile
